# Supplementary material for: Mimicking biological synaptic plasticity with a leaky charge-trap FinFET
Source: Royal Society of Chemistry journal article supplement (doi:10.1039/d2tc01713j), 2022-01-01
Supplement: d2tc01713j1.pdf [file d2tc01713j1.pdf]

Supplementary Information for:

# Mimicking Biological Synaptic Plasticity with a Leaky Charge-Trap FinFET

*Ji-Man Yu,<sup>a</sup> Joon-Kyu Han,<sup>a</sup> and Yang-Kyu Choi<sup>a\*</sup>*

<sup>a</sup> School of Electrical Engineering, 291 Daehak-ro, Korea Advanced Institute of Science and Technology  
(KAIST), Daejeon 34141, *Republic of Korea*

# 1. Fabrication procedure of the leaky-charge trap (LCT) FinFET

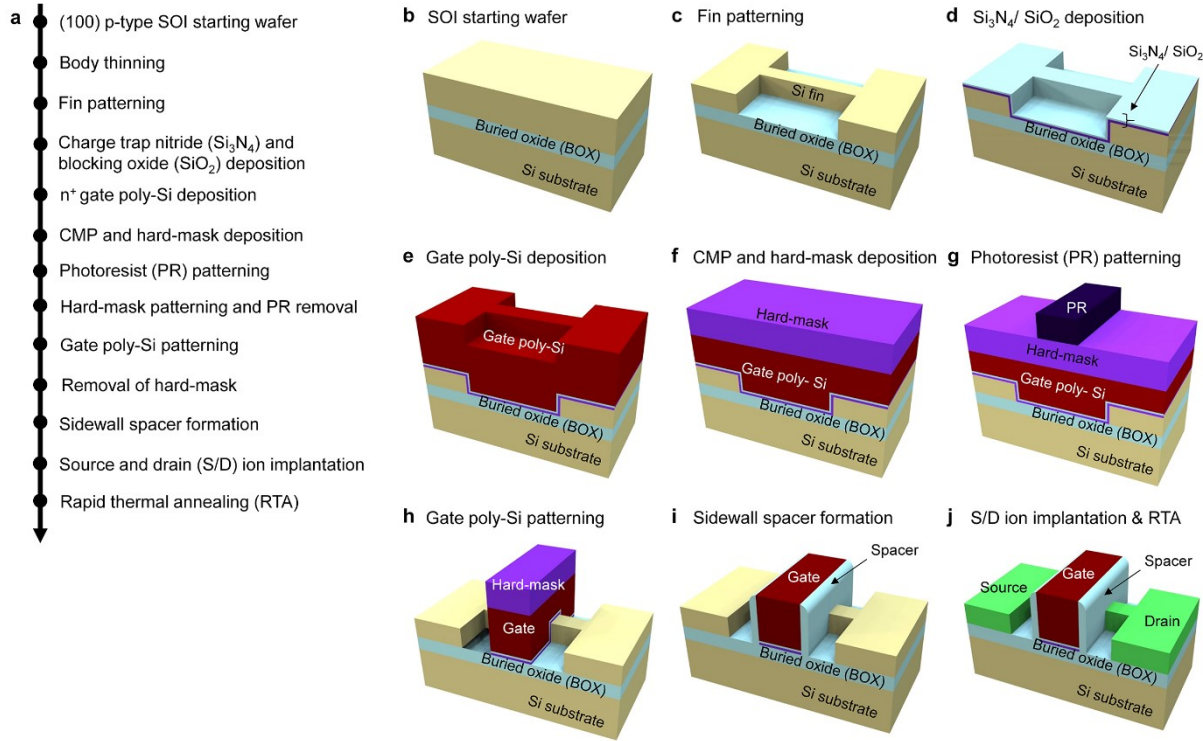

**Figure S1. Process flow of the LCT-FinFET fabrication.**

**Figure S1a** shows the basic sequential process flow used to fabricate the LCT-FinFET. A p-type 8-inch silicon-on-insulator (SOI) wafer with (100) crystal orientation was used as a starting material. The thickness of the top Si and the buried oxide (BOX), were 145 nm and 400 nm, respectively (**Figure S1b**). The thickness of the top Si was thinned to 40 nm by thermal oxidation and subsequent wet etching with diluted HF. Using conventional photo-lithography and plasma etching, it was patterned to define the Si-fin as a channel (**Figure S1c**). Afterwards, nitride ( $\text{Si}_3\text{N}_4$ ) with a thickness of 3.5 nm was deposited by low-pressure chemical vapor deposition (LPCVD) for a charge trap layer (**Figure S1d**). Tetraethyl orthosilicate (TEOS) oxide with 2 nm thickness was deposited as a blocking layer and then *in-situ* heavily doped  $\text{n}^+$  gate poly-silicon (poly-Si) with 100 nm thickness was sequentially deposited by LPCVD (**Figure S1e**). It was then planarized by chemical-

mechanical polishing (CMP). Then, nitride was deposited by LPCVD, to serve as a hard-mask for patterning the gate electrode (**Figure S1f**). After patterning the hard-mask nitride using gate photo-lithography (**Figure S1g**), the photoresist (PR) was removed. With the aid of the etching stopper (hard-mask nitride) the poly-Si gate was patterned by plasma etching (**Figure S1h**). Afterwards, the residual hard-mask nitride was eliminated during the formation of sidewall spacers (**Figure S1i**). Source and drain (S/D) regions were doped with arsenic by ion implantation with a dose of  $5 \times 10^{15} \text{ cm}^{-2}$ . Lastly, dopants were activated by a rapid thermal annealing (RTA) process at  $1000 \text{ }^\circ\text{C}$  for 5 sec (**Figure S1j**). Forming gas annealing (FGA) with diluted  $\text{H}_2$  gas was adopted to minimize the trap density at the interface of the charge trap nitride ( $\text{Si}_3\text{N}_4$ ) and the Si-fin.

## 2. Device-to-device variability of LCT-FinFETs

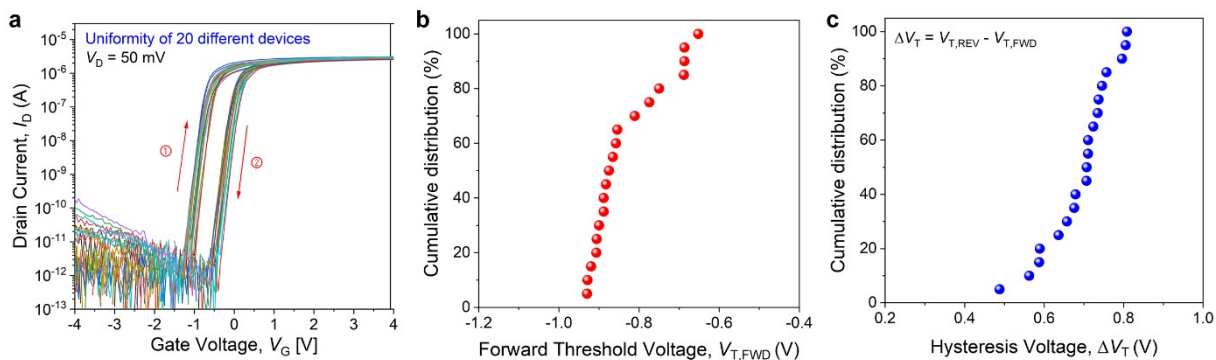

**Figure S2. Device-to-device variability of 20 different LCT-FinFETs. a**, Transfer characteristics ( $I_D$ - $V_G$ ), **b**, Threshold voltage with forward bias sweeping ( $V_{T,FWD}$ ), and **c**, Hysteresis voltage window ( $\Delta V_T$ ).

Device-to-device variability was determined for 20 different LCT-FinFETs, as shown in **Figure S2**. Three basic parameters, transfer characteristics ( $I_D$ - $V_G$ ), threshold voltage with forward bias sweeping ( $V_{T,FWD}$ ),

and hysteresis voltage window ( $\Delta V_T$ ) were measured. Here,  $\Delta V_T$  is defined as the difference in the threshold voltage between forward biasing and reverse biasing, *i.e.*,  $\Delta V_T = V_{T,REV} - V_{T,FWD}$ . Twenty different devices were randomly selected among all the LCT-FinFETs on an 8-inch wafer. Although there were some limitations due to the university equipment and facility, fairly uniform characteristics were obtained using a 100% CMOS process. This uniformity is expected to be further improved if industrial facilities used for mass-production are employed.

### 3. PSC and PPF index after inhibition spike

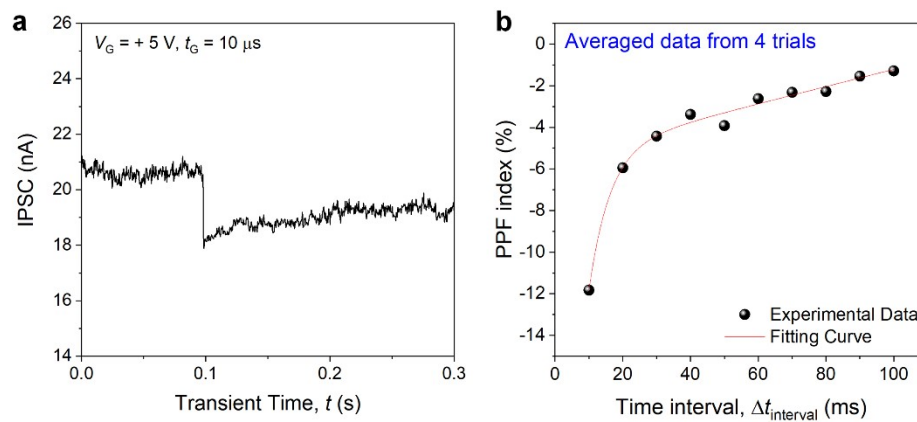

**Figure S3. Inhibitory post-synaptic current (IPSC) response. a**, IPSC after a single positive pre-synaptic spike, **b**, Inhibitory PPF index with respect to different time intervals ( $\Delta t_{\text{interval}}$ ).

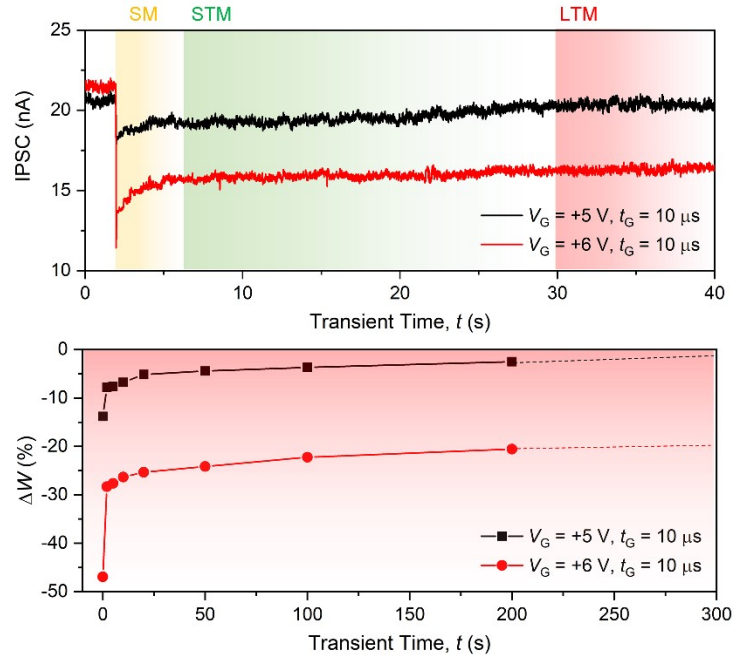

**Figure S4. Memory transition from sensory memory (SM) via short-term memory (STM) to long-term memory (LTM) according to positive  $V_G$ .** STM and LTM plasticities also coexisted in the inhibitory operation.

**Figure S3a** shows the IPSC after a single positive pre-synaptic spike with a  $V_G$  of 5 V and  $t_G$  of 10  $\mu\text{s}$ . The post-synaptic current was reduced after the inhibitory spike. In addition, the inhibitory PPF index with respect to different time intervals ( $\Delta t_{\text{interval}}$ ) was also well-fitted to a double-exponential decay function (**Figure S3b**). Memory transition from SM via STM to LTM was also achieved in the inhibitory operation (Figure S4). When a  $V_G$  of +5 V was applied, the change in synaptic weight ( $\Delta W$ ) was reduced to less than |5| % prior to 50 sec. In contrast, when the  $V_G$  of +6 V was biased, a  $\Delta W$  of more than |20| % was maintained even after 200 sec.

#### 4. Energy consumed during for modulation of synaptic plasticity

| Energy consumption by applied pre-synaptic voltage |                                      |                        |                                                     |
|----------------------------------------------------|--------------------------------------|------------------------|-----------------------------------------------------|
|                                                    | Pre-synaptic pulse<br>( $V_G, t_G$ ) | Gate current ( $I_G$ ) | Energy Consumption<br>( $V_G \cdot I_G \cdot t_G$ ) |
| Excitatory                                         | (-5 V, 10 $\mu$ s)                   | -1.15 nA               | 57.5 fJ/spike                                       |
| Inhibitory                                         | (+5 V, 10 $\mu$ s)                   | 1.29 nA                | 64.5 fJ/spike                                       |

**Table S1** shows the energy consumed with an applied pre-synaptic voltage of  $V_G$  and  $t_G$ , to modulate synaptic plasticity. Although the tunneling barrier layer was removed to enable leaky-charge characteristics, the blocking oxide layer (TEOS) suppresses gate leakage current ( $I_G$ ) while applying pre-synaptic spikes. When  $\pm 5$  V pre-synaptic pulses were applied, the measured  $I_G$  were 1.29 nA and -1.15 nA, respectively. As a consequence, the energy consumption while modulating the synaptic plasticity was approximately 60 fJ/spike, which is comparable to the energy consumption of a biological synapse in the human brain (10 fJ/spike).

## 5. Spike timing dependent plasticity (STDP) according to synaptic learning rule

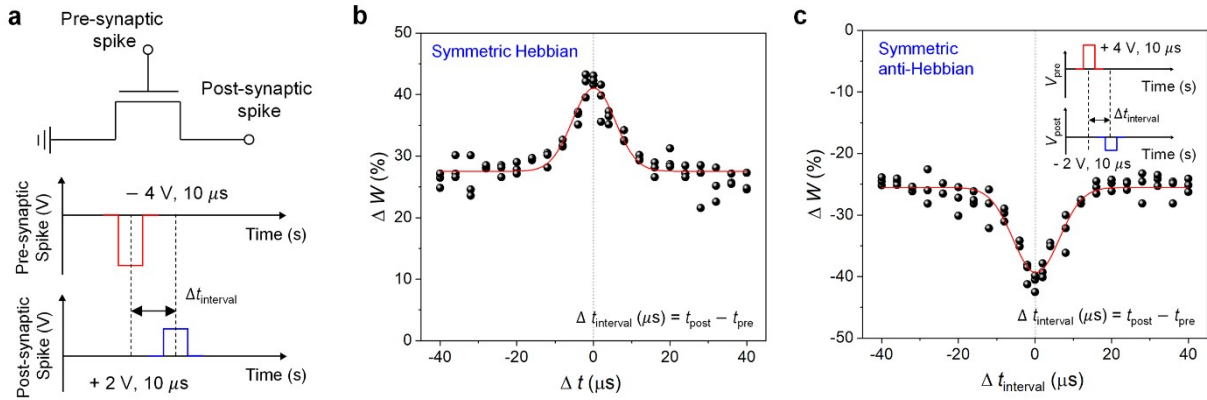

**Figure S5. STDP synaptic learning rule.** **a**, Schematic illustration of the applied pre- and post-synaptic spikes applied for symmetric behavior. **b**, Symmetric Hebbian behavior. **c**, Symmetric anti-Hebbian behavior can be observed when opposite polarity pre- and post- synaptic spikes were applied to the case in **Figure S5a**.

In the STDP synaptic learning rule, synaptic plasticity is modulated in response to the time interval ( $\Delta t_{\text{interval}}$ ) between the pre- and post- synaptic spike ( $V_{\text{pre}}$  and  $V_{\text{post}}$ ). **Figure S5a** shows the waveform of an applied pre- and post-synaptic spike. To reduce the hot carrier effect induced by the high lateral electric field ( $E_{\text{lateral}}$ ) between the source and drain, a small amplitude of 2 V ( $V_D$ ) was used as a post-synaptic spike.  $\Delta W$  is well-fitted to a Gaussian distribution, which shows a typical symmetric Hebbian and a symmetric anti-Hebbian learning behavior, as shown in **Figures S5b** and **c**.
